# Supplementary material for: Novel near-diploid ovarian cancer cell line derived from a highly aneuploid metastatic ovarian tumor
Source: PubMed Central journal article supplement (PMC5546722; doi:10.1371/journal.pone.0182610), 2017-08-07
Supplement: pone.0182610.s003.pdf [file pone.0182610.s003.pdf]

**S3 Table. Size of focal copy number alterations.**

| Sample           | FCNA size           |                                       |                                       |                      |                                        |                                        |
|------------------|---------------------|---------------------------------------|---------------------------------------|----------------------|----------------------------------------|----------------------------------------|
|                  | Focal gains (range) | Large gains >10Mb<br>(average/median) | Small gains <10Mb<br>(average/median) | Focal losses (range) | Large losses >10Mb<br>(average/median) | Small losses <10Mb<br>(average/median) |
| <b>MT1</b>       | 38Kb-40.1Mb         | 28,065Kb/30,387Kb                     | 674Kb/170Kb                           | 29Kb-86.7Mb          | 28,086Kb/21,181Kb                      | 2,148Kb/1,051Kb                        |
| <b>OVDM1-P3</b>  | 46Kb-14.9Mb         | 14,860Kb                              | 451Kb/177Kb                           | 55Kb-48.9Mb          | 48,910Kb                               | 468Kb/300Kb                            |
| <b>OVDM1-P18</b> | 30Kb-17.5Mb         | 13,953Kb                              | 335Kb/252Kb                           | 26Kb-48.9Mb          | 31,062Kb                               | 608Kb/287Kb                            |
| <b>OVDM1-P30</b> | 30Kb-17.4Mb         | 14,723Kb                              | 475Kb/248Kb                           | 26Kb-48.9Mb          | 30,616Kb/22,553Kb                      | 850Kb/289Kb                            |
